# Supplementary material for: Spatiotemporal Changes in Plasmodium vivax msp142 Haplotypes in Southern Mexico: From the Control to the Pre-Elimination Phase
Source: MDPI journal article supplement (doi:10.3390/microorganisms10010186), 2022-01-15
Supplement: s1 [file s1]

**Table S1.** Origin and accession numbers of the *pvmSP142* sequences obtained from NCBI;  
<https://www.ncbi.nlm.nih.gov/> (accessed on 28 December 2021).

| GenBank accession number                                                                                                    | Number of sequences | Region          | Country            | References                                                                                   |
|-----------------------------------------------------------------------------------------------------------------------------|---------------------|-----------------|--------------------|----------------------------------------------------------------------------------------------|
| KR871926 - KR872017                                                                                                         | 92                  | Central America | Nicaragua          | Gutiérrez et al., 2016[40]                                                                   |
| AF435593<br>AF435594<br>AF435622- AF435625<br>AF435627<br>AF435629- AF435631<br>AF199405- AF199407                          | 13                  | South America   | Brazil             | Putaporntip et al., 2002[41]<br>Putaporntip et al., 2000[42]                                 |
| AB564559 - AB564588                                                                                                         | 30                  | Middle East     | Turkey             | Zeyrek et al., 2010[43]                                                                      |
| EU430452 - EU430479<br>AF435616 - AF435620<br>KF612323<br>AF435639                                                          | 35                  | South of Asia   | India - Bangladesh | Thakur et al., 2008[44]<br>Sheikh et al., 2014[45]<br>Putaporntip et al., 2002[41]           |
| GU175174 - GU175268<br>AJ292349 - AJ292359                                                                                  | 106                 | South of Asia   | Sri Lanka          | Dias et al., 2011[19]<br>Manamperi et al., 2016 unpublished                                  |
| AF199393 - AF199404<br>AF199408 - AF199410<br>AF435595 - AF435599<br>AF435601 - AF435615<br>GQ890872 - GQ891041<br>GQ912337 | 206                 | Southern Asia   | Thailand           | Putaporntip et al., 2000[42]<br>Putaporntip et al., 2002[41]<br>Jongwutiwes et al., 2010[46] |
| JX461286 - JX461295<br>JX461300 - JX461310<br>JX461312 - JX461317<br>JX461319 - JX461333<br>JX461297<br>JX461298            | 44                  | Southern Asia   | Cambodia           | Parobek et al., 2014[20]                                                                     |
| GU971656 - GU971705                                                                                                         | 50                  | Southern Asia   | Singapore          | Ng et al., 2010[47]                                                                          |
| JX490129 - JX490156<br>JX993754<br>JX993755                                                                                 | 30                  | Southern Asia   | Myanmar-China      | Zhou et al., 2017[21]                                                                        |
| HQ171934 - HQ171941<br>AF435635 - AF435638<br>JQ446312 - JQ446322                                                           | 23                  | East Asia       | South Korea        | Han et al., 2011[48]<br>Putaporntip et al., 2002[41]<br>Kang et al., 2012[18]                |
| AF435632<br>AF435634                                                                                                        | 2                   | Oceania         | Vanuatu            | Putaporntip et al., 2002[41]                                                                 |
