# Supplementary figures and images for: Spatiotemporal Changes in Plasmodium vivax msp142 Haplotypes in Southern Mexico: From the Control to the Pre-Elimination Phase
Source: MDPI journal article supplement (doi:10.3390/microorganisms10010186), 2022-01-15

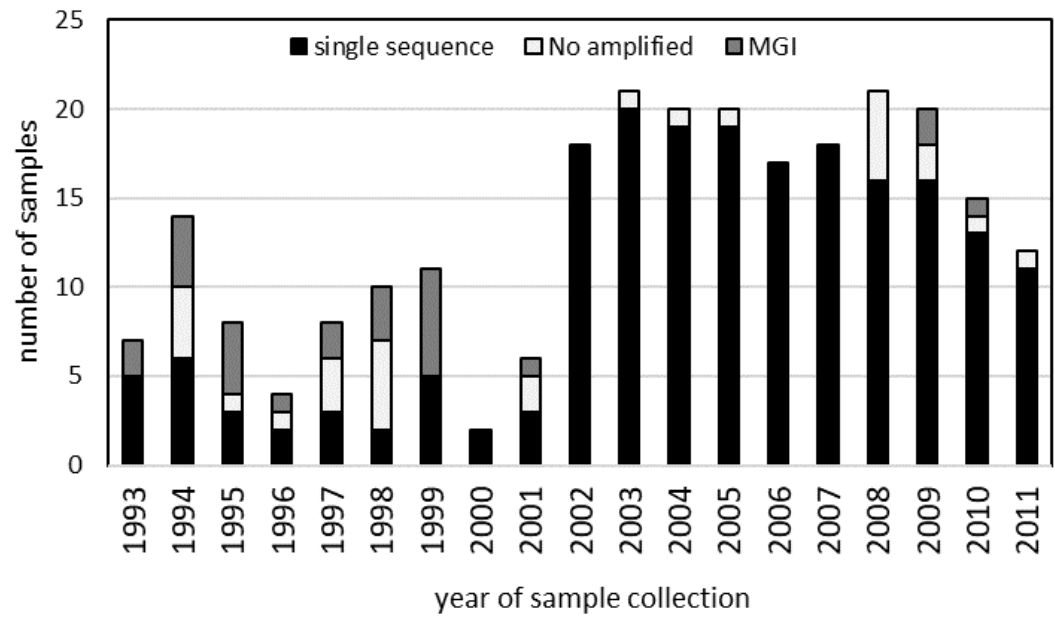

**Figure S1.** *P. vivax* samples from southern Mexico, 1993-2011.

Supplement: s1 [file s1]

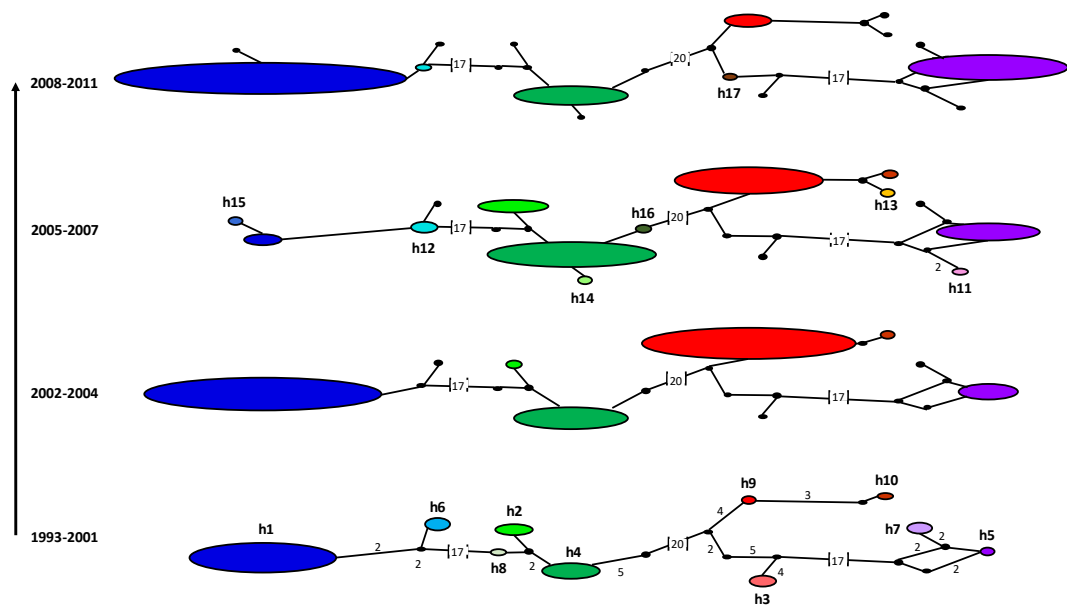

**Figure S2.** Temporal haplotype distribution of *Plasmodium vivax* pvmsp142 in southern Mexico.

Supplement: s1 [file s1]
